# Supplementary material for: Validation of Aeolus winds using radiosonde observations and NWP model equivalents
Source: Copernicus journal article supplement (doi:10.5194/amt-2020-404), 2020-10-12
Supplement: Supplementary file [file amt-2020-404-AC2-supplement.pdf]

## Response to Referee Comment (RC2) on

### Validation of Aeolus winds using radiosonde observations and NWP model equivalents

<https://doi.org/10.5194/amt-2020-404>

We are grateful for the referee's careful reading and the detailed and insightful discussion on our manuscript. The responses to the individual comments and the corresponding changes in the manuscript are presented in the following.

#### **General Comment:**

*The manuscript is well structured and addresses an important topic of the new observation system which is of significant importance for the NWP. It is found as an important contribution to the Aeolus special edition and is well in the scope of the scientific journal. The methods applied are well designed. It is appreciated that a reference data from two independent models are provided, which allows to address the issue of the model related bias as current bias correction methods are still dependent on the model itself. The estimate of the various error sources is explained, however, the section on the representativeness error is not very clear (please see next paragraph for details). Below I list several minor issues that should be resolved. Some suggestions are as well provided*

#### **Specific Comments:**

##### Comment #2.1:

*Abstract is overall well understood. However, I have some questions: The bias correction applied in April 2020 is the M1 temperature correction, however, in the abstract the longitude-latitude related bias correction is described. I found this confusing when reading the abstract and I suggest modifying sentence on line 20 such that it is clear that the operational bias correction at ECMWF is not the one studied in the manuscript.*

##### Response to Comment #2.1:

We agree, that the information in the abstract about the operational bias correction after the brief description of the longitude-latitude bias components investigated in the study can be confusing for the reader. To make clear that the L2B processor bias correction applied in April 2020 is different to the correction approach shown in the following paper the detail, that the operational bias correction is based on the telescope temperature is added:

**Since 20 April 2020 a telescope temperature-based bias correction scheme has been applied operationally in the L2B processor, developed by the Aeolus Data Innovation and Science Cluster (DISC).**

---

##### Comment #2.2:

*What does expression "analytical" (Line 49) represent? I don't see it necessary and I suggest removing it.*

##### Response to Comment #2.2:

The message of the whole paragraph is, that validation studies, that are necessary to acquire knowledge of statistical errors, are based on a systematic investigation of comparisons with collocated observations (reference data sets). The expression analytical means, that all decisive factors and components are to be taken into account for the comparisons. To avoid misunderstandings the expression “analytical” is replaced:

**For this purpose, uncertainty assessment and validation through extensive comparisons with reference data is an essential requirement to assimilate these novel observations in NWP models and fully exploit the provided wind information.**

---

Comment #2.3:

*I believe in methodology section it should be mentioned what is the time span of the validation (i.e. validation period). It is mentioned in terms of baseline but not in terms of date-time, which is important for readers not directly related with the Aeolus mission.*

Response to Comment #2.3:

The following sentence in the section Data and Method (line 98ff.) already describes the validation time period of this study in terms of date-time (month and year), which includes three mission phases:

***Furthermore, the instrument performance varied over the time period assessed in this study, which includes the missions Commissioning Phase (CP) from launch until the end of January 2019, the late Flight Model A (FM-A) laser period until mid of June 2019, and the FM-B laser period until the end of December 2019.***

Furthermore, the time periods of the different baselines are shown in Figure 1.

---

Comment #2.4:

*A word on quality control. This is first mentioned in (Line 106). But it is confusing because it is not clear what all is part of quality control? Is it defined just by L2B HLOS error estimate or anything else? There were problems with hot pixels in FM-A period, which has been handled with specific QC (for example). I suggest adding few sentences about this in case more complex QC has been used (in methodology).*

Response to Comment #2.4:

For the Aeolus data, all parts of quality control are described in the paragraph in the end of section 2.1.: To make this more clear the word quality control criteria is mentioned in an additional sentence before this part:

**For the validation, the following quality control criteria are applied. Only valid Rayleigh clear and Mie cloudy winds (from now on referred to as Rayleigh and Mie) between 800 and 80 hPa are used. A distinction is made between the ascending...**

Further, to point out how many data pass the quality monitoring used in this study, the following information is added:

**Based on a compromise between the quality of the data set and the number of observations that pass the quality control, Rayleigh winds with an estimated error greater than  $6 \text{ m s}^{-1}$  and Mie winds with an estimated error greater than  $4 \text{ m s}^{-1}$  are excluded. Thus, on average over the validation period about 70 % of the Rayleigh and 76 % of the Mie winds are available for the analysis.**

Because there is a preprint paper about the hot pixel issue since November 2020, we added the following sentence and reference:

**On June 14, 2019 a correction scheme for dark current signal anomalies of single pixels (hot pixels) on the Accumulation-Charge-Coupled Devices (ACCDs) of the Aeolus detectors has been implemented into the Aeolus operational processor chain (Weiler et al., 2020). All measurements before June 14, 2019 affected by hot pixels are excluded from the validation statistic.**

**Weiler, F., Kanitz, T., Wernham, D., Rennie, M., Huber, D., Schillinger, M., Saint-Pe, O., Bell, R., Parrinello, T., and Reitebuch, O.: Characterization of dark current signal measurements of the ACCDs used on-board the Aeolus satellite, Atmospheric Measurement Techniques Discussions, 1–39, <https://doi.org/10.5194/amt-2020-458>, <https://amt.copernicus.org/preprints/amt-2020-458/>, 2020.**

---

Comment #2.5:

*The sentence given in lines (145-147) is not clear. What is the meaning of “. . . 10 deg. Latitude x 10 deg. Longitude and limited periods of 7 day”? I am not sure how to interpret this information. Could this be better explained?*

Response to Comment #2.5:

We agree, that the description of how the global statistic is calculated should be explained and motivated in more detailed. Therefore, we added the following part at the end of Section 2.3.:

**To put the regional validation results in a global context, a global statistic with the ECMWF O-B values is calculated, additionally. For this, a similar approach of limited regions and limited time periods is chosen. O-B statistics are calculated for regions of 10° latitude x 10° longitude and over periods of seven days before they are averaged for the whole globe, to reduce the influence of horizontal and temporal fluctuations of systematic errors on the random errors.**

---

Comment #2.6

*In the collocation methodology of radiosondes. What is the reason for choosing the 500 m in vertical (Line 123)? Is this some sort of trade-off to have enough large sample? The HLOS range-bins are thinner near the ground especially for Mie.*

Response to Comment #2.6:

In the mid and in the upper troposphere/lower stratosphere the range bins are up to 2000 m. The winds below 800 hPa are excluded in this validation study due to noisy signal and poor data quality (especially before changes in Mie resolution). The 500 m collocation criteria is not based on a specific condition, but it seems to be a meaningful choice to ensure a good balance between sample size and accuracy.

---

Comment #2.7

*For the model description given in Section 2.3 I suggest adding the information on horizontal resolution of both models (like it is provided for COSMO and ICON LES in the text below). I think this is important for the understanding the representativeness error of HLOS winds when compared to various models.*

#### Response to Comment #2.7:

Following the reviewer's suggestion, we added the information about the horizontal resolution of the global model ICON from DWD and the ECMWF IFS model:

**The first guess forecast of the deterministic ICON with approximately 13 km horizontal resolution is used to calculate the observation first guess departures (O-B). In contrast to the ECMWF data assimilation system (4D-Var) with a resolution of approximately 9 km, the observations are not used at their actual time, but all observations within an observation window ( $\pm 1.5$  hr around the analysis time) are assumed to be valid at the analysis time.**

---

#### Comment #2.8

*The methodology on the estimation of representativeness error is not very clear (section 2.4). The same for results give in Section 3.2.1. It is not clear how the estimation of the various representativeness errors is actually performed (for the purpose of reproducibility of data presented in manuscript). How exactly are two high resolution models used to estimate the representative error of HLOS if first L2B HLOS is compared to global model (Eq. 6b) and second to radiosondes (Eq. 6a)? What is a definition of point and line measurement in the scope of estimation of representativeness error (Line 250)? I don't understand how values are computed (Line 254, 255, 264). Values reported in Lines 254,255 are found as sigma\_b in Table 2. Please clarify. I suggest providing more detailed explanation of the methodology used (in section 3.2.1) in section 2.4?*

#### Response to Comment #2.8:

We agree that the estimation of the representativeness error can be explained more clearly. Therefore, the explanation in the methodology part is updated to provide more information about the different error components contributing to the representativeness error:

#### **2.4 Representativeness errors for the Aeolus wind validation**

**The knowledge of representativeness errors is a key to determine the Aeolus winds instrumental error. Firstly, representativeness errors arise due to different measurement geometries of the compared data sets. Whereby the Aeolus HLOS wind observations correspond to line measurements, the NWP models are treating the Aeolus HLOS winds as point measurements. Also, the radiosonde observations can be regarded as point measurements. For the estimation of the representativeness error for the comparison of radiosonde and Aeolus data, three further error sources need to be taken into account: The spatial and temporal difference resulting from the collocation criteria; the spatial and temporal difference resulting from the displacement during the radiosonde ascents when radiosonde data from alphanumeric reports are assimilated (13% of the radiosonde data); and the temporal offset value for the grouping time interval when accounting for balloon drift in BUFR data (87% of the radiosonde data). The different error components are evaluated using analysis data of the regional COSMO-DE model of five seven-day periods (February, April, June, October, and December 2016). The COSMO-DE model covers Germany, Switzerland, Austria, and parts of other neighboring states and has a horizontal grid spacing of 2.8 km and 50 levels in the vertical. The data are only used up to 12 km to avoid influences of large model errors and uncertainties of the simulation in the stratosphere. To determine the effect of unresolved scales in the COSMO-DE analyses, the results are compared to a three day (3 to 6 June 2016) large-eddy simulation with the ICON model centered over Germany with 150 m horizontal resolution and 150 levels in the vertical. This way, an offset value is calculated, which is added to the representativeness**

**errors. A more detailed description of the estimation of the Aeolus instrumental error is provided in Section 3.2.**

Further, Section 3.2.1 about the representativeness error as part of the Aeolus instrumental error estimation is changed to make the calculation more understandable for the reader:

### **3.2.1 Representativeness error $\sigma_r$**

**To achieve an estimate of the representativeness error, COSMO-DE analyses of different seasons of the year 2016 are used. The model representativeness error  $\sigma_{r\_model}$  is calculated comparing the point like measurement geometry of the HLOS wind model equivalents with the measurement geometry of the Aeolus observations. An Aeolus observation can be regarded as an averaged value of a 90 km line for the Rayleigh winds and Mie winds till 5 March 2019, and as an averaged value of a 10km line for the Mie winds after 5 March 2019. As the Aeolus HLOS winds mainly correspond to the zonal wind component, only the differences in u between a single point and a horizontal line average is determined. The calculation is performed for the whole COSMO-DE model domain and the values are averaged over the height levels corresponding to the Aeolus range bin setting and weighted by the mean number of Aeolus winds measurements for the Rayleigh and the Mie channel (Figure 2 right-hand side). The resulting  $\sigma_{r\_model}$  is  $0.50 \text{ m s}^{-1}$  for the Rayleigh winds,  $0.52 \text{ m s}^{-1}$  for the Mie winds with 90 km horizontal resolution and  $0.12 \text{ m s}^{-1}$  for the Mie winds with 10 km horizontal resolution.**

**For the estimation of the radiosonde representativeness error  $\sigma_{r\_RS}$ , error sources caused by spatial and temporal displacements need to be considered, additionally to the different measurement geometries of the radiosonde and the Aeolus observations. Therefore, it is necessary to make a distinction between radiosondes for which the drift is assimilated (87%), and those reports which only contain the launch position and time (13%). For both cases, the temporal and the spatial part of the representativeness error, resulting from the collocation criteria, has to be considered. The error due to the spatial displacement is assessed by determining the differences between a point and a line measurement as weighted mean over distances up to 120 km in east-west and north-south direction, and calculating the weighted average over altitude. To account for the temporal displacement, a time offset value is estimated by assessing the representativeness error of the appropriate spatial displacement. The mean wind velocity over the validation period ( $15.27 \text{ m s}^{-1}$ ) and the temporal collocation criteria of 90 min results in a spatial displacement of 82 km, which corresponds to a representativeness error of  $1.26 \text{ m s}^{-1}$  for both channels with 90 km horizontal resolution and  $1.40 \text{ m s}^{-1}$  for the Mie winds with 10 km horizontal resolution. For the 13% of the radiosonde data without the drift information, additionally an error component due to the spatial displacement up to 50 km and an error component due to the temporal displacement during the radiosonde ascents up to 90 min has to be considered. For the 87% of the radiosondes with the drift information, a temporal offset value for the 15 min time interval, into which the data are grouped, has to be taken into account. Those parts of the representativeness error are calculated accordingly to the parts resulting from the collocation criteria, using the COSMO-DE analyses. To determine the overall contribution, the variances of the three different error components are summed up. As a last step, the effect of unresolved scales in the COSMO-DE analyses has to be assessed by using the high-resolution ICON-LEM simulation. Figure 2 (left-hand side) shows the differences between a point and a line measurement averaged and weighted over distances up to 200 km as a function of altitude for the ICON-LEM and COSMO-DE data of the same date. The COSMO-DE model underestimates the representativeness error compared to the ICON-LEM simulation. On average, the offset value between the two models is  $0.20 \text{ m s}^{-1}$ . This offset value is added to the sum of the variances of the different error components, resulting in a representativeness error of  $2.48 \text{ m s}^{-1}$  for the Rayleigh winds,  $2.49 \text{ m s}^{-1}$  for**

**the Mie winds with 90 km horizontal resolution and 2.66 m s<sup>-1</sup> for the Mie winds with 10 km horizontal resolution.**

---

Comment #2.9

*In line 183 (section 3.1 in general) and Table 1 I found some confusing information about the term “mean absolute difference” (and mean absolute bias). What exactly is computed here? Is this an average of absolute values of BIAS shown in Figure 1. If so, in Table 1 |BIAS| is confusing?*

Response to Comment #2.9:

Table 1 shows the average of the absolute values of Figure 1. To be exact, these values are differences, but like mentioned in Section 2.5. **(Given that the model bias for long validation periods and large scales is usually small in comparison to that of Aeolus observations, the mean difference between the Aeolus observations and the reference data can be referred to as bias.)** the differences between the Aeolus observations and reference data sets can be referred to as bias. To avoid confusion the absolute value bars are removed in the table. The caption already gives the information that the mean absolute bias estimates are shown.

---

Comment #2.10

*At the end of Line 195: “. . . of limited areas (10 deg. Latitude . . .”. This is related to the comment given before. I don’t understand what is meant by this. How are these limited areas used for computation of global statistics? (See please the same comment above).*

Response to Comment #2.10:

See Response #2.5

---

Comment #2.11

*Line 197. I would not agree for Mie descending. But I would say that the values for global statistics are in the range of values of all three (radiosondes, ECMWF and DWD) local statistics. Which, on the other hand, does not hold for Rayleigh-clear statistics.*

Response to Comment #2.11:

We agree, that the estimated global mean absolute bias for Mie is in the range of all three local statistics. Due to the fact, that all three local statistics include only values around the radiosonde collocations (see Section 2.3. : **To ensure comparable data sets for the radiosonde and the ECMWF and DWD model validation of the Aeolus winds, only the nearest O-B value per radiosonde collocation is used for the model validation statistics.**), the expression ‘validation statistics around the radiosonde collocations’ includes all three local statistics. To avoid any misunderstandings, we slightly modified the sentence:

**For the Mie winds, the global statistic shows values in the range of the three local validation statistics around the radiosonde collocations.**

---

Comment #2.12

Line 218. Which bias correction update? I suggest being specific and to mention that this is the one that is validated in the following sections (the lon-lat dependent one).

Response to Comment #2.12:

The L2B processor bias correction update in December 2019, which is mentioned here, is not the one validated in the following. It was a manual bias correction of + 4 m/s in the Rayleigh wind product to compensate for a global average bias drift, which is due to another effect - a changing Rayleigh internal reference response. To be more precise, this information is added:

**This is caused by a manual L2B processor bias correction of + 4 m s<sup>-1</sup> in the Rayleigh wind product to compensate for a global average bias drift.**

---

Comment #2.13

In Table 2 the  $\sigma_b$  for Mie on 90 km is about 0.5 m/s but only 0.12 m/s when on 10 km. What is a scientific reason for this? Because no matter the Mie accumulation the IFS HLOS is always an interpolation to the L2B HLOS center of gravity location. So is this the result of QC used or maybe better L2B classification on clear cloudy for smaller accumulations?

Response to Comment #2.13:

Due to the smaller horizontal resolution there are a lot more Mie HLOS wind observations which reduces the error, especially in cloudy sky condition. To address the differences in  $\sigma_b$  (Mie) the following passage is added in section 3.2.2.:

**As NWP models in general tend to exhibit higher uncertainty in cloudy than in clear sky areas,  $\sigma_b$  is larger for the Mie winds with 90 km horizontal resolution. After the decrease of the horizontal integration length of the Mie wind measurements to approximately 10 km in the L2B product, the number of Mie wind observations increased, leading to a reduction in model error.**

---

Comment #2.14

Line 295: Sentence started with "Since the representativeness . . ." is not clear. What does it mean? What is the range of estimated uncertainties?

Response to Comment #2.14:

We agree that this part should be formulated more exactly. It has been modified as follows:

**Because the estimation of the representativeness error is based on averaged values of analyses which only cover the area around Germany at certain time periods, the values are affected by small uncertainty factors. As the model error estimates are also associated with uncertainty, it is assumed that the discrepancies between the radiosonde and model validation are due to uncertainties in the calculation of the different error sources.**

---

Comment #2.15

Line 337: It is confusing how the bias correction is applied (Eq. 7). "i=1 being the current day" suggests that at the day of applying the bias correction the O-B for that same day are as well included. Isn't that the bias correction factor for a particular day is provided from O-B of previous days?

Response to Comment #2.15:

This wrong information is changed: **i = o being the the current day**

---

Comment #2.16

*Figure 6: the pattern looks very random. Are these differences statistically significant (especially for ascending orbit)?*

Response to Comment #2.16:

Figure 6 shows the absolute differences between the ECMWF IFS and the ICON model O-B values, exemplary for May 2019. With this plot we want to demonstrate that the differences are indeed not statistically significant (as the reviewer has noted) and thus justify that the O-B statistics as function of latitude and longitude (Figure 5) are only presented for the ECMWF first guess departures.

---

Comment #2.17

*How does the computed estimate of the Aeolus instrument error compare with the L2B estimated HLOS instrument error? By the values reported in the manuscript this seems quite well in range, but I miss this comparison. It would be of interest to see how good is the L2B error estimation algorithm. Has this been studied?*

Response to Comment #2.17:

It turned out, that the L2Bp estimated error has to be treated carefully due to a bug until the baseline change in April 2020. Basically, it overestimated the error in daylight conditions (i.e., large UV solar background noise). Therefore, if looking at the NH in summer (late FM-A) the estimated errors are all too large. However, this issue is not fully understood yet and there are ongoing studies regarding the L2Bp estimated error. Consequently, no comparisons between the observation instrument noise estimate and the estimated instrumental error are made in this paper, which would be also beyond the original scope of the paper. It is agreed that a thorough investigation of the L2B error estimates would deserve a separate study

---

Comment #2.18

*In addition, for Conclusions. The bias correction method used is essentially a temporal and spatial smoothing. This is as well a source of bias residuals shown in Figure 4 and 6, as bias correction method is not able to react on fast changes in systematic errors that happens along the Aeolus orbit.*

Response to Comment #2.18:

We appreciate the reviewer's comment about the bias correction method. We agree that the temporal and spatial smoothing of the correction approach should be mentioned in the text. We added the following lines in the summary and discussion part:

**As the bias correction approach is essentially a temporal and spatial smoothing, it is suggested that fast changes in systematic errors are one source of the bias residuals.**

Further modification:



The following reference has been added to the introduction part as example for already published Aeolus wind validation studies:

**Baars, H., Herzog, A., Heese, B., Ohneiser, K., Hanbuch, K., Hofer, J., Yin, Z., Engelmann, R., and Wandinger, U.: Validation of Aeolus wind products above the Atlantic Ocean, Atmospheric Measurement Techniques Discussions, 2020, 1–27, <https://doi.org/10.5194/amt-2020-198>, 2020.**

### ***Technical stuff***

*A general note on Figures. I suggest to use the same framework on all images. This is by using labels (a,b . . .). At the moment this is not true everywhere and on some images (Right, Left, . . .) is used instead. In addition, on some Figure there is no units, this should be corrected.*

*Line 253: Please use the uniform Figure labels (i.e. a,b,. . .)*

*Figure 2: Please use labels a,b,. . .*

*Figure 5: missing labels*

*Figure 6: missing labels*

- > changed accordingly: labels (a), (b), (c) are added to Figure 2, units are added to Figure 5 and 6

*Line 8: instead of “comparisons” it would be maybe better to use “the validation”*

- > no changes , as we think the current wording is more appropriate

*Line 11: If the “independent reference data sets” are the two models, I suggest here to be specific and change this with “. . . between the two model data sets”*

- > changed accordingly: “between the three independent reference data sets”

*Line 11: I suggest to switch “representativeness” into “representative of Aeolus winds”*

- > changed accordingly: “Due to the greater representativenesses errors associated with the comparisons using radiosonde observations, the random differences are larger for the validation with radiosondes compared to the model equivalent statistics.”

*Line 13: Sentence (To achieve . . .) is not well understood. I suggest turning it around “Besides the . . . the Aeolus instrument error is estimated . . .” or similar*

- > no changes, as we think the current wording is more appropriate

*Line 16: The expression “depend on” should probably be changed to “vary with”*

- > changed accordingly: depend on --> “vary with”

*Line 25: Better be specific. I suggest to switch “Earth’s wind” to “atmospheric wind”*

- > changed accordingly: Earth's wind fields --> “atmospheric wind fields”

*Line 26: The sentence “Within seven days, . . .” is not completely correct. The orbit does not cover the globe as the footprint is in scale of meters and orbits are separated by 1000 km or more. But the repeat cycle of the orbit is about 7 days. I suggest to rewrite this*

- > changed accordingly: Within seven days --> “Within about seven days”

*Line 27: Could remove the “only one large instrument”, it is not necessary*

- > no changes, as we think the current expression is more appropriate

*Line 31: First two sentences could be switched. It reads better*

- > no changes, as we think the current order of the sentences reads better

*Line 36: Could remove “on” and “parts”*

- > no changes, as we think the current wording is more appropriate

*Line 42: At the end of the sentence “. . . geostrophic balance” I suggest to put some reference. For example, <https://doi.org/10.1175/BAMS-86-1-73>*

- > the following reference is added: Stoffelen, A., Pailleux, J., Källén, E., Vaughan, M., Isaksen, L., Flamant, P., Wergen, W., Andersson, E., Schyberg, H., Culoma, A., Meynart, R., Endemann, M., and Ingmann, P.: The Atmospheric Dynamics Mission for Global Wind Field Measurements, Bulletin of the American Meteorological Society, 86, 73–88, 2005

*Line 45,46: I suggest to add few additional valuable references (<https://doi.org/10.1256/qj.05.83>, <https://doi.org/10.1002/qj.43>, <https://doi.org/10.1002/qj.2430>).*

- > no changes, as we think the five references are sufficient here.

*Line 67: I suggest to put a new paragraph just before “The text is struct. . .”*

- > a new paragraph is insert

*Line 71: “representativeness error of comparisons”, this is very confusing. Could the expression “comparisons” be removed here?*

- > changed accordingly: “The derivation of error estimates for the Aeolus instrumental error includes the determination of representativeness errors which is based on analysis data from...”

*Line 80: In reference “ECMWF: . . .” the “ECMWF:” should be removed.*

- > changed accordingly: ECMWF is removed in the reference

*Line 86: “The resulting HLOS wind” should be modified by “The resulting HLOS wind observation therefore represents a horizontal average over . . .”*

- > changed accordingly: “The resulting HLOS wind observation therefore represents a horizontal average over 86.4 km.”

*Line 87: The reference “Matic et al” should be changed to “Šavli et al”*

- > reference is modified accordingly: Matic et al. --> “Šavli et al.”

*Line 87 (end): “the” should be removed.*

- > changed accordingly: “In addition to HLOS observations, ...”

*Line 89: “. . ., to avoid systematic errors. . .” should be changed to “. . . to reduce the HLOS systematic error . . .” (for example). This is because there are other sources of systematic error that exist. Line 93: I suggest to change the “. . . types” to “... resulting in four wind products (i.e. Rayleigh-clear, Rayleigh-cloudy, Mie-clear and Mie-cloudy).” to be more specific.*

- > changed accordingly: “Furthermore, to reduce systematic errors, ...”
- > changed accordingly: “Wind retrievals are performed for both channels resulting in four observation products (Rayleigh-clear, Rayleigh-cloudy, Mie-clear and Mie-cloudy).”

*Line 95: Again the reference “EMCWF: . . .” should be corrected by removing “ECMWF:”*

- > changed accordingly: ECMWF is removed in the reference

*Line 115 (and 116): I suggest to rewrite a bit into “...is taken into account by splitting data into groups of 15 min.”*

- > changed accordingly: “... by splitting data into groups of 15 min .”

*Line 116 (by the end): Please correct “contains” into “contain”.*

- > changed accordingly: contains --> “contain”

*Line 118: Please correct “the ascent and the ascent” into “the ascent and the descent”.*

- > changed accordingly: “Due to the radiosonde drift during the sounding and the ascent time, additional errors arise.”

*Line 156: I suggest to change the heading title into: “statistical measures”, “statistical metrics”, “validation metrics”, or something similar. “Statistical characteristics” is not valid for description of statistical metrics that have been used. For Eq. 2 I suggest to add that index “i” represents time. Eq 3-4 seem incomplete. In results bias is provided for radiosonde, and 2 models. I suggest to explain here that different biases and STD are provided for different reference data. This should be seen by equations defined here. At the moment it seems that Eq 6 for STD is always computed taking BIAS from model (even if STD is computed for radiosondes). I believe this is not what has been used. Correct me please if I am wrong. Eq 5 is as well confusing. I suggest to replace this with the definition for MAD (so removing the “scaled”), which is a very basic measure. And in the text it should be mentioned that scaled MAD is used instead which is defined as  $1.4826 * MAD$  because it provides a measure similar to STD for normal samples.*

- > changed accordingly: Statistical characteristics --> “Statistical metrics”
- > the indices used in the equations are explained by adding the following phrase: “...,where i represents the time step and N is the number of compared data points.”
- > to avoid confusion, we defined  $v_{diff(HLOS)}$  in Eq 2 and 3 to represent the difference between the Aeolus L2B HLOS wind and the HLOS wind value of the different reference data sets.  $v_{diff(HLOS)}$  is also used in the equation for STD and the scaled MAD to make them easier to understand. The following sentence is added after Eq 4 and 5: “For quantifying random deviations, the standard deviation (Eq4) as well as the scaled median absolute deviation (MAD)(Eq 5) is determined for the three reference data sets.”

*Title of heading in section 3 is confusing. It suggest shorten it. Maybe something like “Aeolus HLOS error time series characteristics”.*

- > we agree, that the title is somehow too long. It is changed accordingly: “Validation results - time series characteristics and error estimation of Aeolus HLOS wind comparisons”. The time series (Section 3.1) show the results of the comparisons which are, to be correct, differences and not errors. Subsequently (Section 3.2), estimated error values are determined.

*Line 199: Please modify “. . . wind bias, . . .” to “...wind bias and random error, . . .” Line 204: “modes” is probably “mode”?*

- > unchanged, because the following part focuses only on the systematic differences. Random differences are discussed before
- > changed accordingly: standby modus --> “stand-by mode”

*Line 227: Please correct “bu” to “but”*

- > changed accordingly: bu --> “but”

*Line 237: Please correct “differences” to “difference”*

- > changed accordingly: differences --> “difference”

*Line 253: Please use the uniform Figure labels (i.e. a,b,. . .)*

*Figure 2: Please use labels a,b,. . .*

*Table 2: In caption “...(Representativeness errors . . .” should be corrected to “...(representativeness errors ...)”*

- > changed accordingly: (Representativeness errors...) --> (representativeness errors...)

*Line 329: “Thus, it is tested . . .” should be correct to “Thus, it is first tested . . .”*

- > changed accordingly: Thus, it is tested --> “Thus, it is first tested...”

*Line 401: I think this is not needed as this is already given in the last paragraph of Introduction.*

- > no changes, as we think with this information it reads better

*Line 406 (at the end): Please correct “as” to “as a”*

- > no changes , as we think the current wording is more appropriate

*Line 480, 483 and 485: Please check if this kind of referencing is correct.*

- > changed accordingly: ECMWF is removed in the reference (Rennie, M., Tan, D. G. H., Andersson, E., Poli, P., Dabas, A., de Kloe, J., Marseille, G.-J., and Stoffelen, A.: Aeolus Level-2B Algorithm Theoretical Basis Document (Mathematical Description of the Aeolus Level-2B Processor), AE-TN-ECMWF-L2BP.0023, V.3.21, 2020.).

The ESA ADM-Aeolus Science Report and the ESA ADM-Aeolus Mission Requirements Documents are referenced in the same way for example in Lux et al. (2020) and Witschas et al. (2020)

*Line 502: Please correct “Matic. S” to “Šavli. M” and “Zagar. N” to “Žagar. N”*

- > reference is modified

*Line 536: Please correct “Zagar. N” to “Žagar. N”*

- > reference is modified
